# Supplementary material for: One-pot synthesis of ferrocenyl dithiocarbamates and their application in the detection of Cu2+
Source: Royal Society of Chemistry journal article supplement (doi:10.1039/d2nj04133b), 2022-01-01
Supplement: d2nj04133b1.pdf [file d2nj04133b1.pdf]

## Supporting Information

### **One-pot synthesis of ferrocenyl dithiocarbamates and its application for the detection of Cu<sup>2+</sup>**

Junyang Dong<sup>a,b</sup>, Jianfeng Hu<sup>a,c</sup>, Hao Zhang<sup>a,c\*</sup>

<sup>a</sup>School of Chemical & Chemical Engineering, Inner Mongolia University, Hohhot  
010021, P. R. China.

<sup>b</sup>State Key Laboratory of Solid Lubrication, Lanzhou Institute of Chemical Physics,  
Chinese Academy of Sciences, Lanzhou 730000, P. R.China

<sup>c</sup>Inner Mongolia Key Laboratory of Fine Organic Synthesis, Hohhot 010021, P. R.  
China.

\*Corresponding Author, tel: +86-471-4994406, fax: +86-471-4994406, e-mail:  
haozhang@imu.edu.cn; zh\_hjf@hotmail.com.

### Contents

|                                                                            |           |
|----------------------------------------------------------------------------|-----------|
| <b>1. General information.....</b>                                         | <b>2</b>  |
| <b>2. <sup>1</sup>H, <sup>13</sup>C NMR spectra for all compounds.....</b> | <b>3</b>  |
| <b>3. Figure S1.....</b>                                                   | <b>17</b> |
| <b>4. Figure S2.....</b>                                                   | <b>17</b> |
| <b>5. Figure S3.....</b>                                                   | <b>18</b> |
| <b>6. Figure S4.....</b>                                                   | <b>18</b> |

## 1. General information.

All reagents were used as received from commercial sources, unless specified otherwise, or prepared as described in the references. N-tosylhydrazone and ammonium dithiocarbamate were prepared according to the literature method. Solvent dioxane was distilled over sodium. All Solvents were purified according to standard references procedures. For chromatography, 200-300 mesh silica gel (Qingdao, China) was employed.  $^1\text{H}$  and  $^{13}\text{C}$  NMR spectra were recorded at 500 MHz and 125 MHz FT-NMR spectrometer. Chemical shifts are reported in ppm using tetramethylsilane as internal standard when  $\text{CDCl}_3$  was used as solvent. The HRMS analysis was obtained on a QTOF mass spectrometer. Melting points were determined with melting points apparatus and are uncorrected. The data of **3a** and **3e** were collected on a Bruker APEX II CCD Mo- $\text{K}\alpha$  radiation ( $\lambda = 0.71073 \text{ \AA}$ ) and measured at room temperature.

## 2.<sup>1</sup>H, <sup>13</sup>C NMR spectra for all compounds

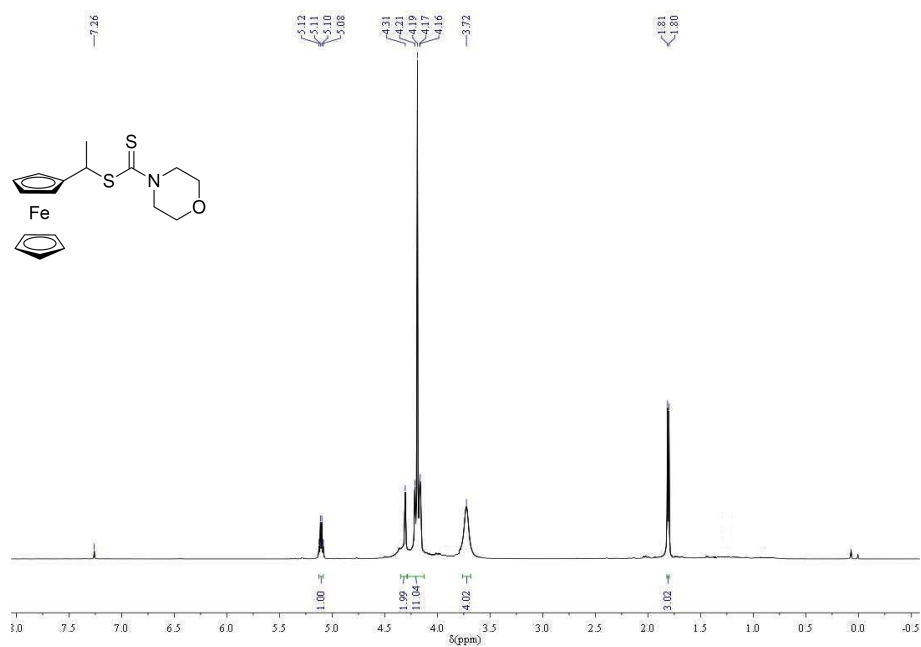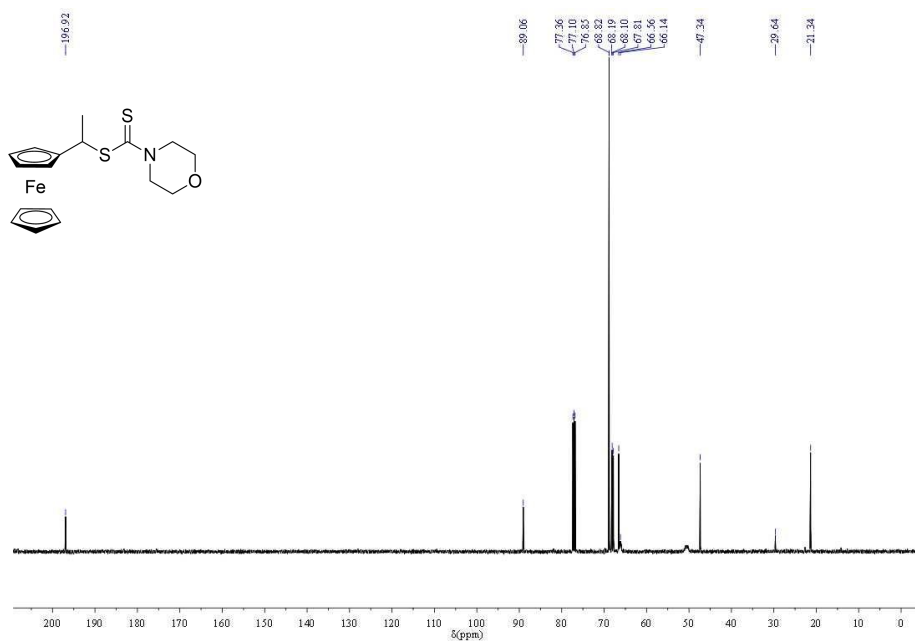

<sup>1</sup>H NMR spectra and <sup>13</sup>C NMR spectra for **3a**.

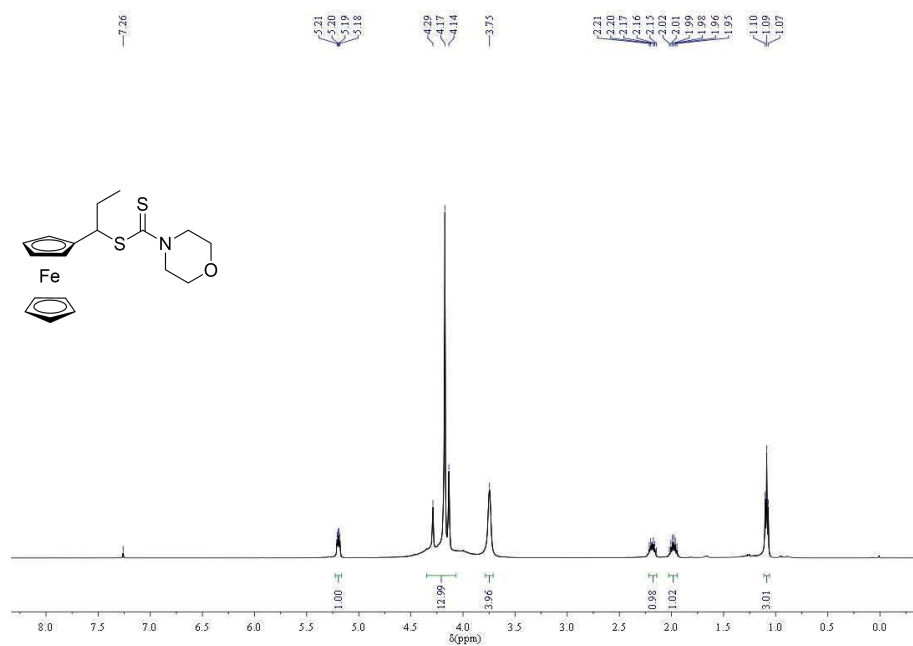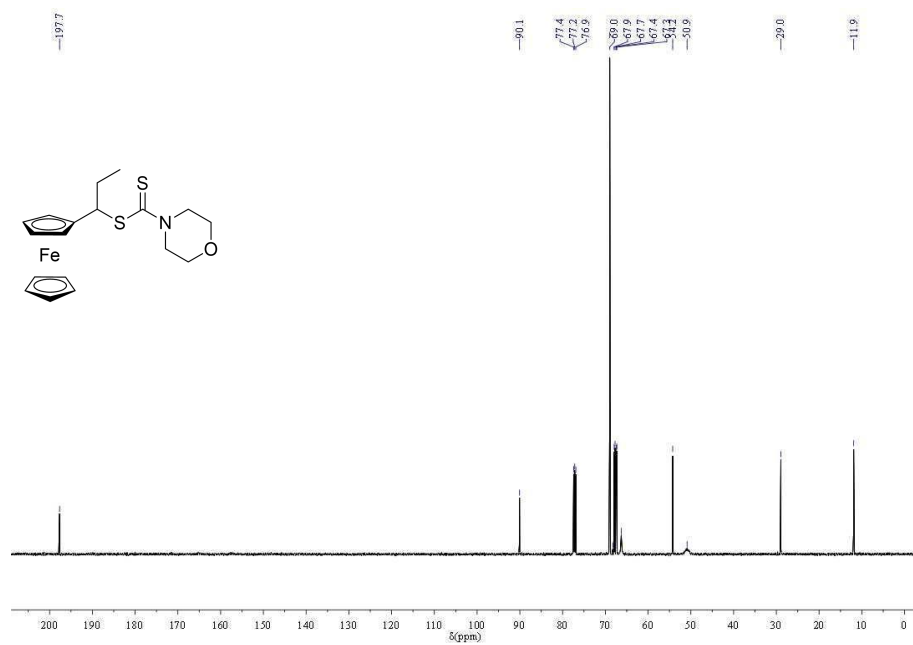

<sup>1</sup>H NMR spectra and <sup>13</sup>C NMR spectra for **3b**.

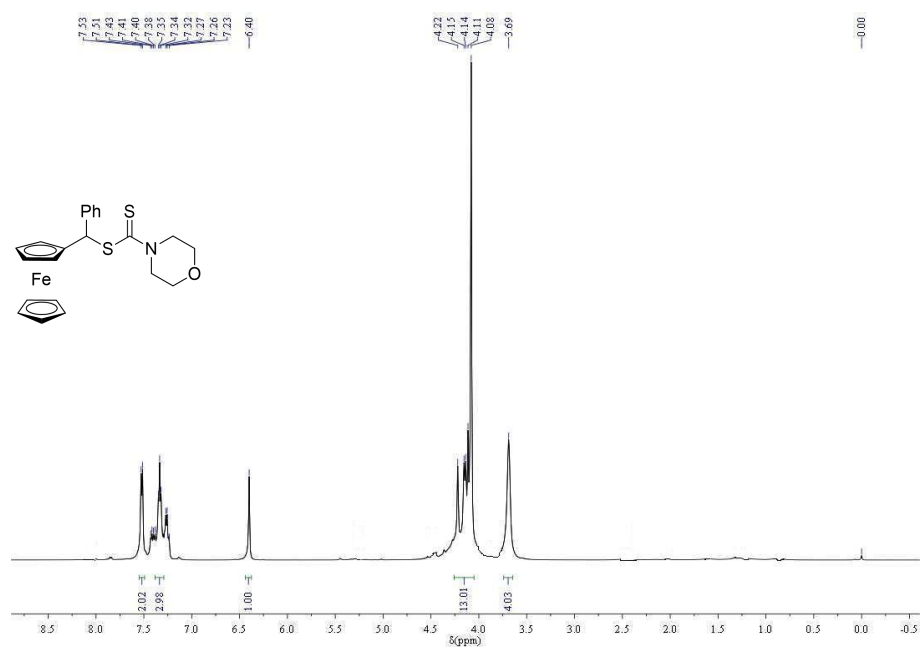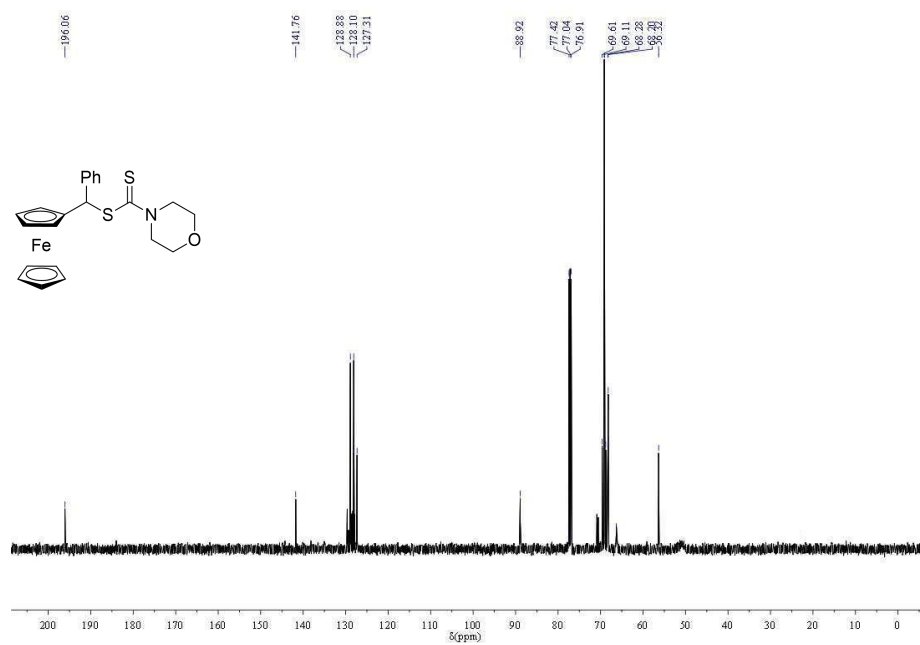

<sup>1</sup>H NMR spectra and <sup>13</sup>C NMR spectra for 3c.

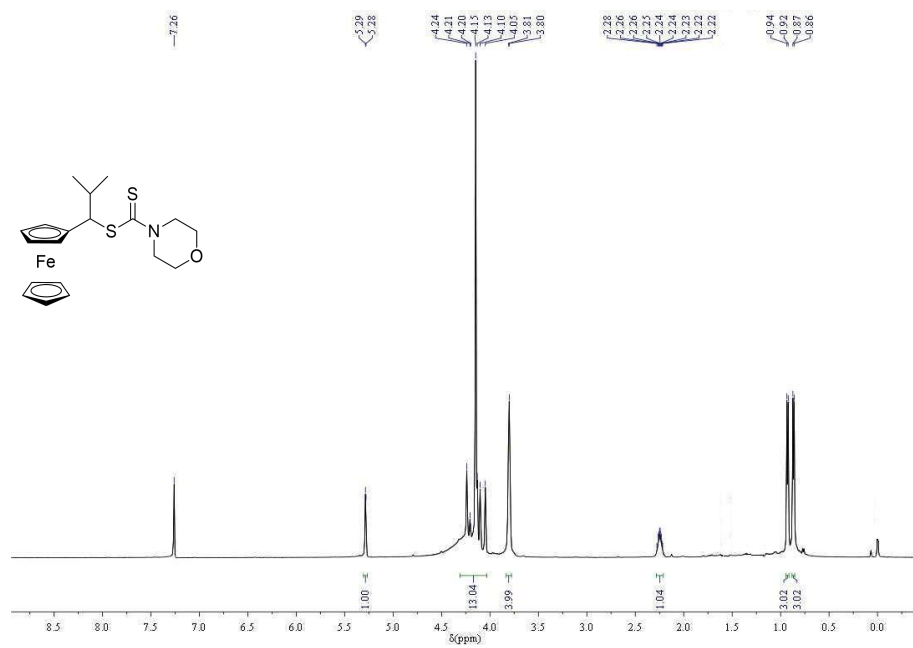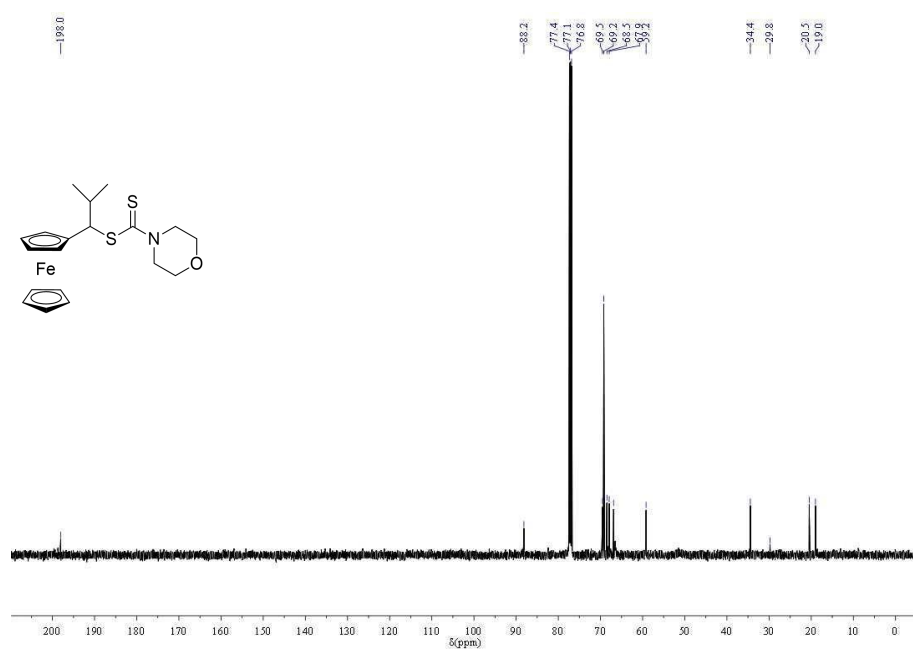

<sup>1</sup>H NMR spectra and <sup>13</sup>C NMR spectra for **3d**.

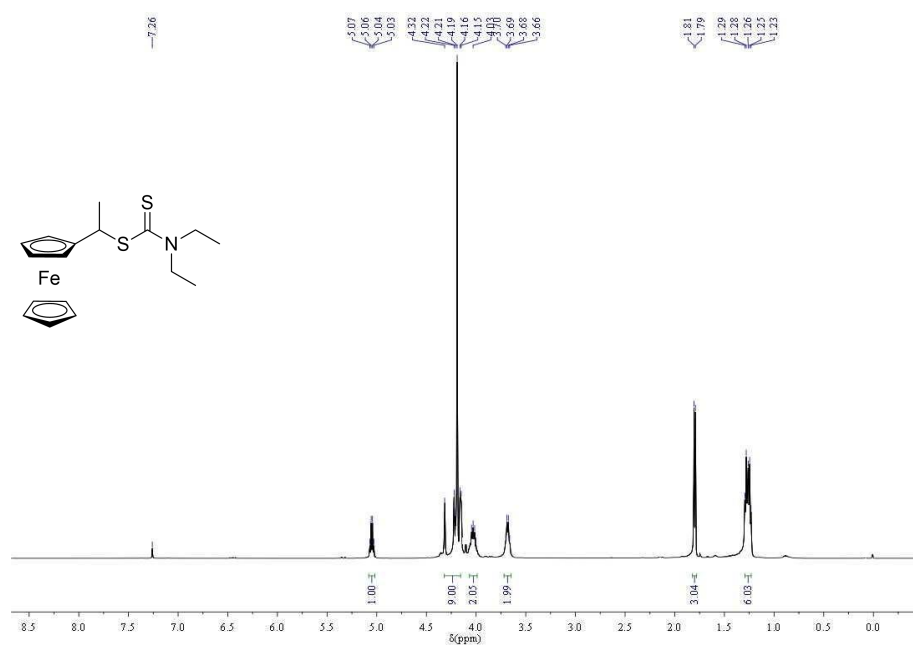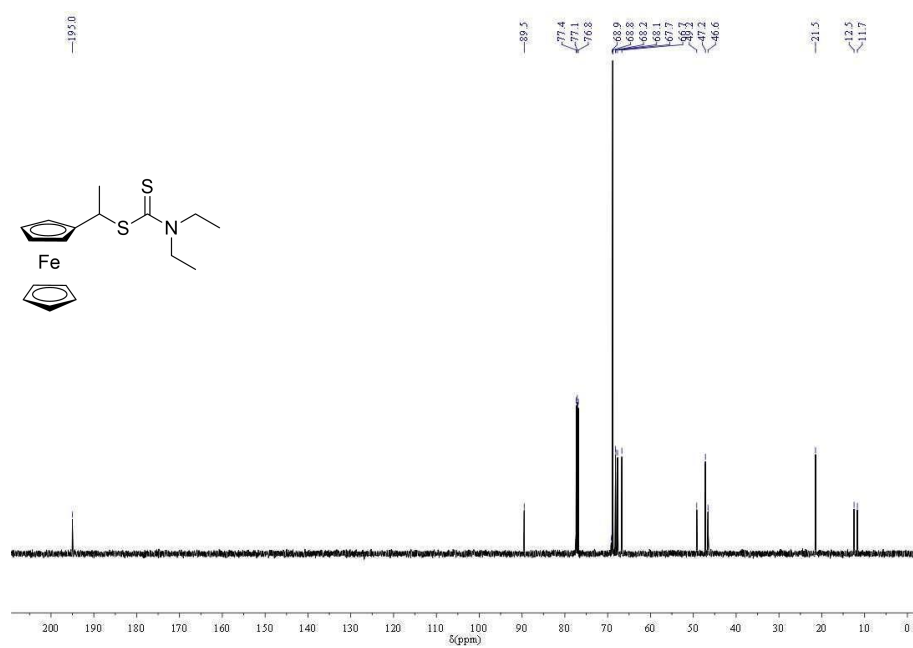

$^1\text{H}$  NMR spectra and  $^{13}\text{C}$  NMR spectra for **3e**.

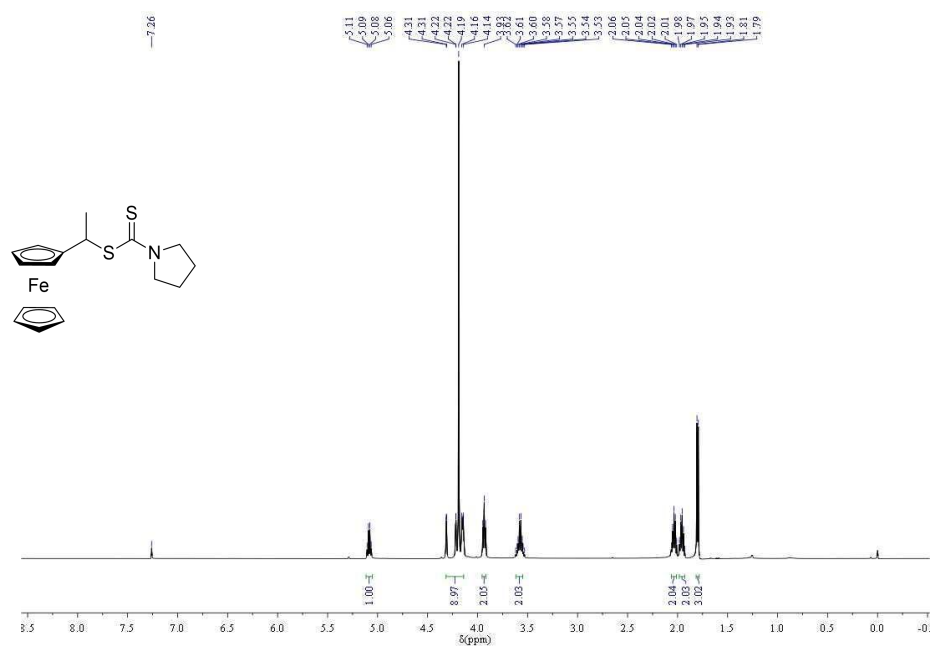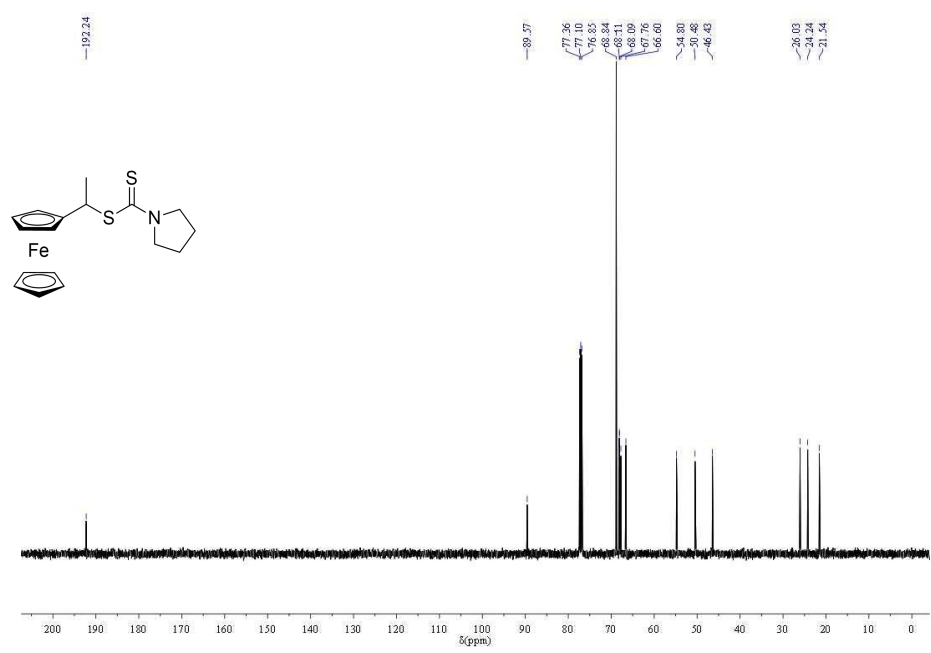

$^1\text{H}$  NMR spectra and  $^{13}\text{C}$  NMR spectra for **3f**.



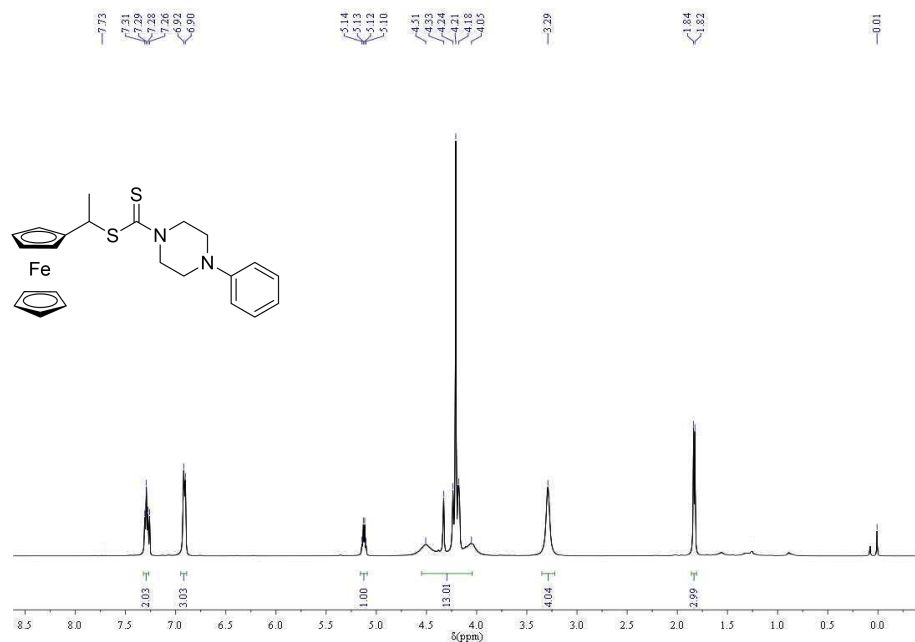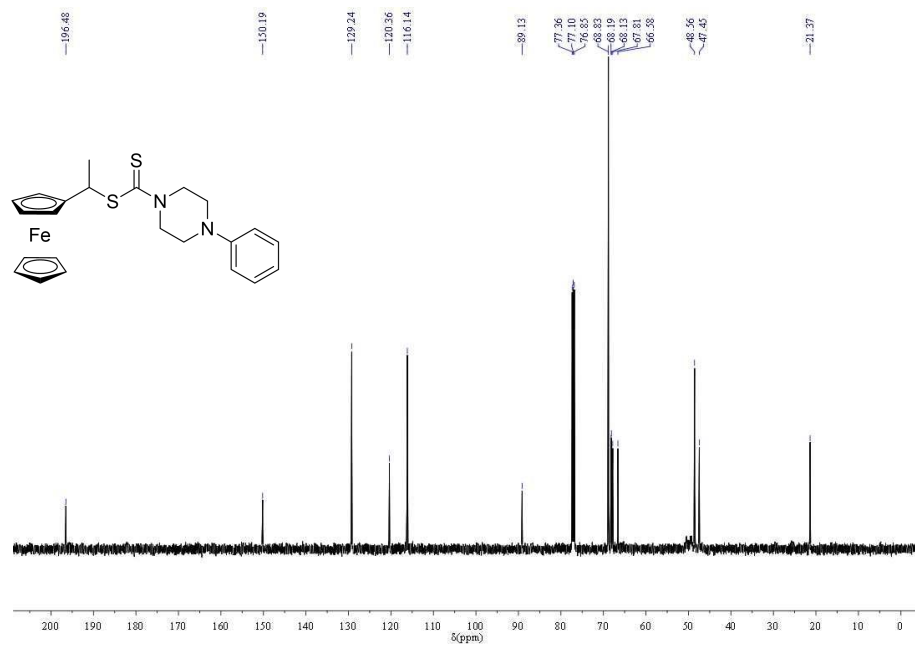

<sup>1</sup>H NMR spectra and <sup>13</sup>C NMR spectra for **3g**.

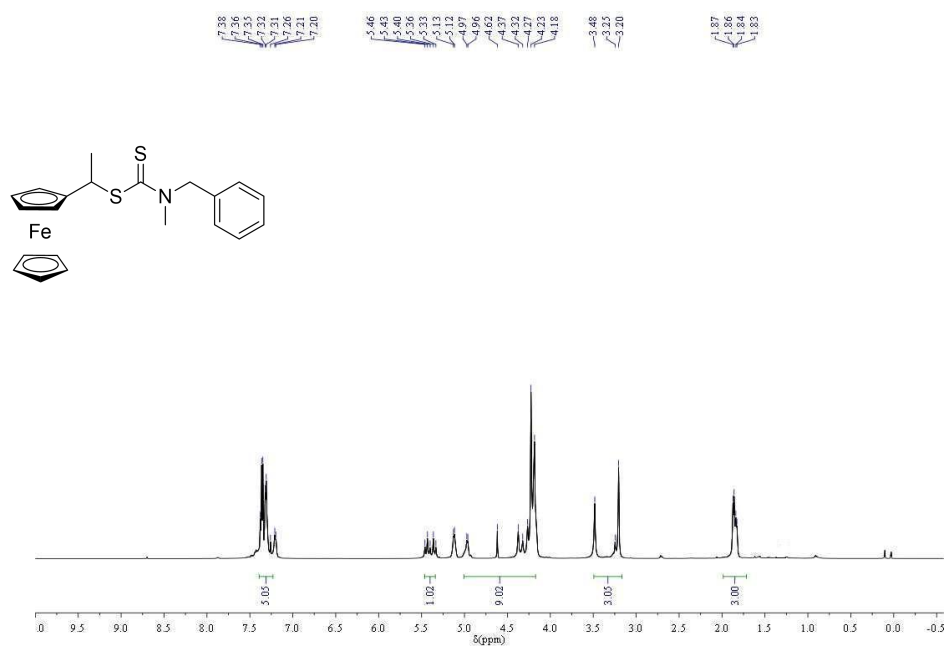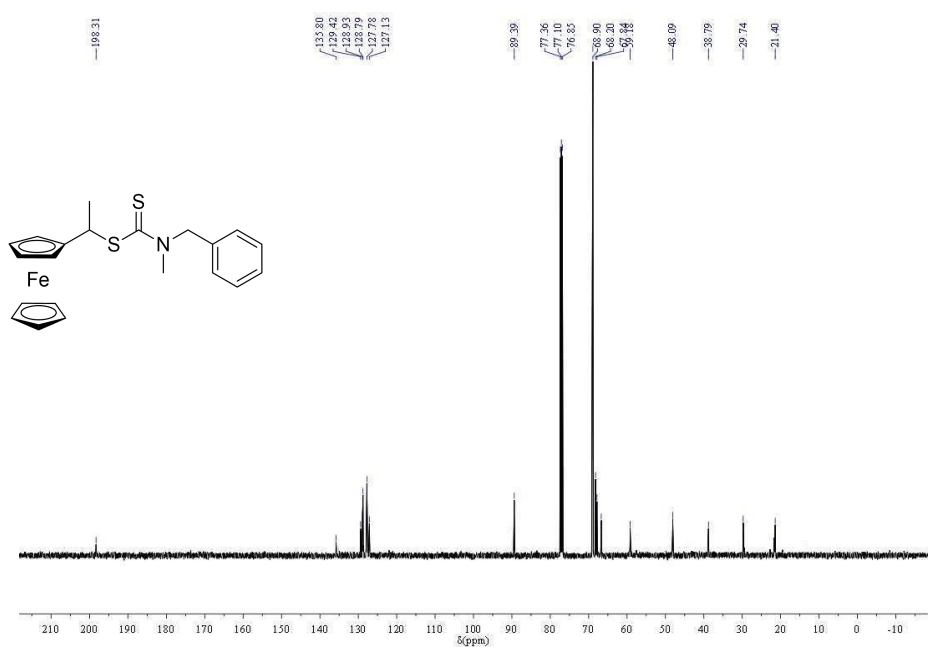

<sup>1</sup>H NMR spectra and <sup>13</sup>C NMR spectra for **3h**.

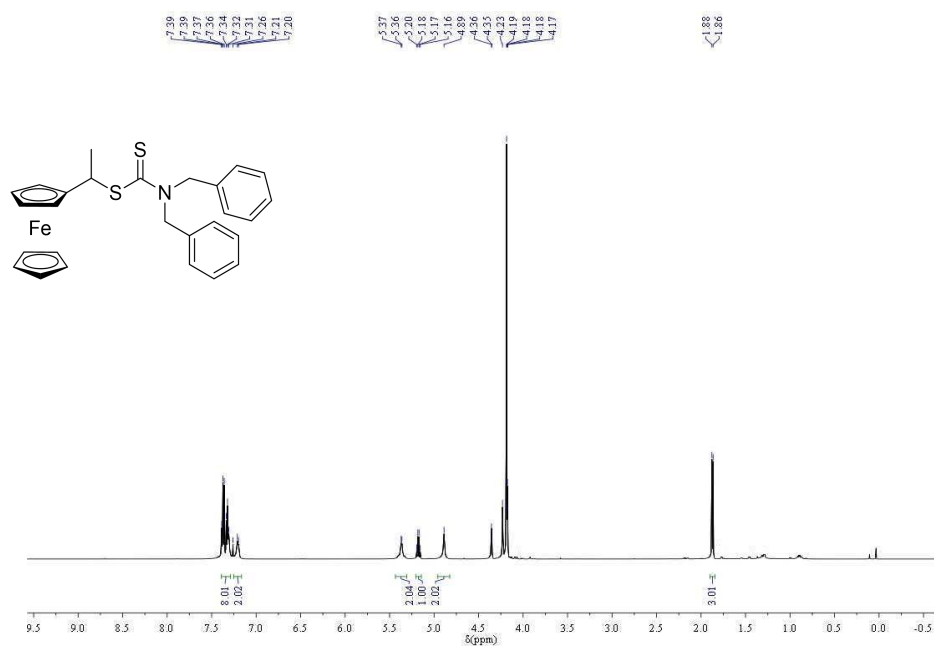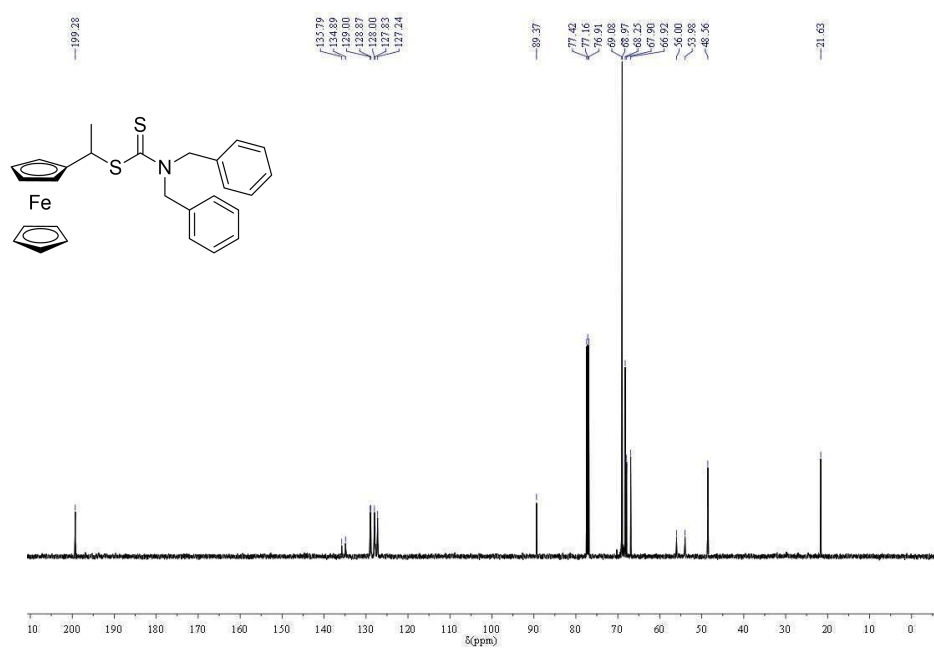

$^1\text{H}$  NMR spectra and  $^{13}\text{C}$  NMR spectra for **3i**.

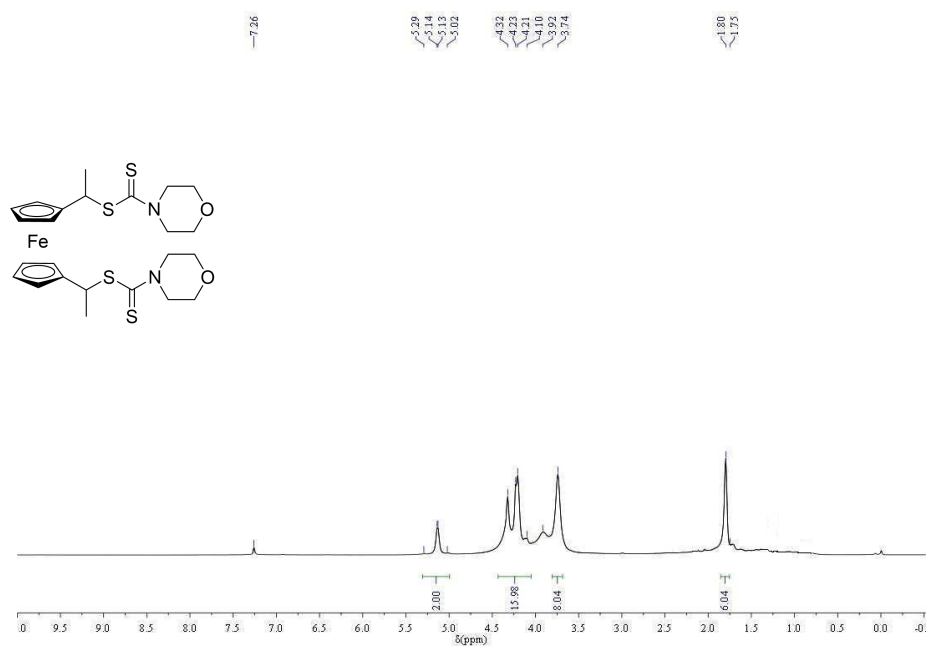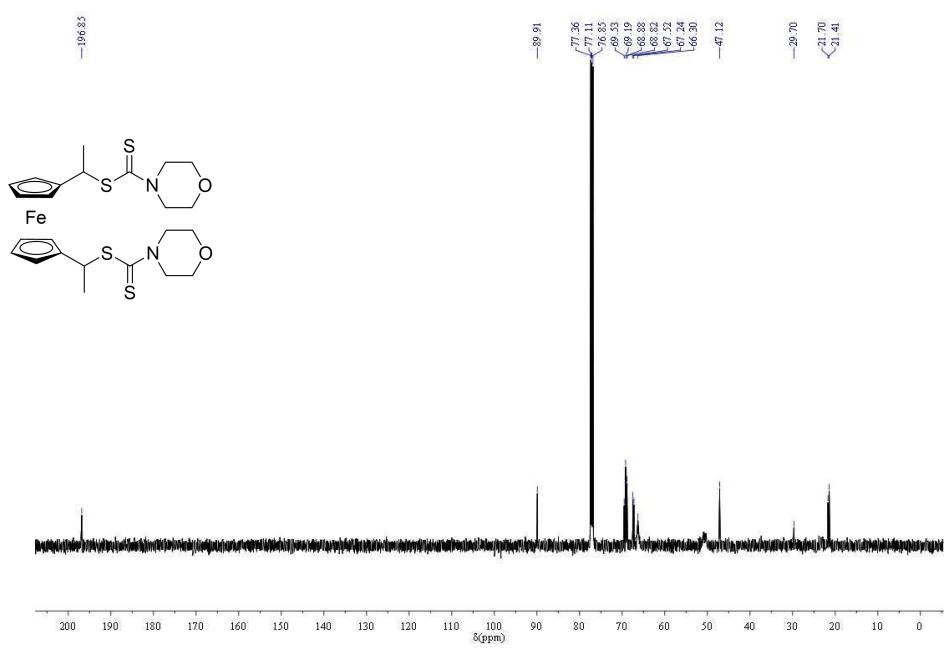

<sup>1</sup>H NMR spectra and <sup>13</sup>C NMR spectra for **5a**.

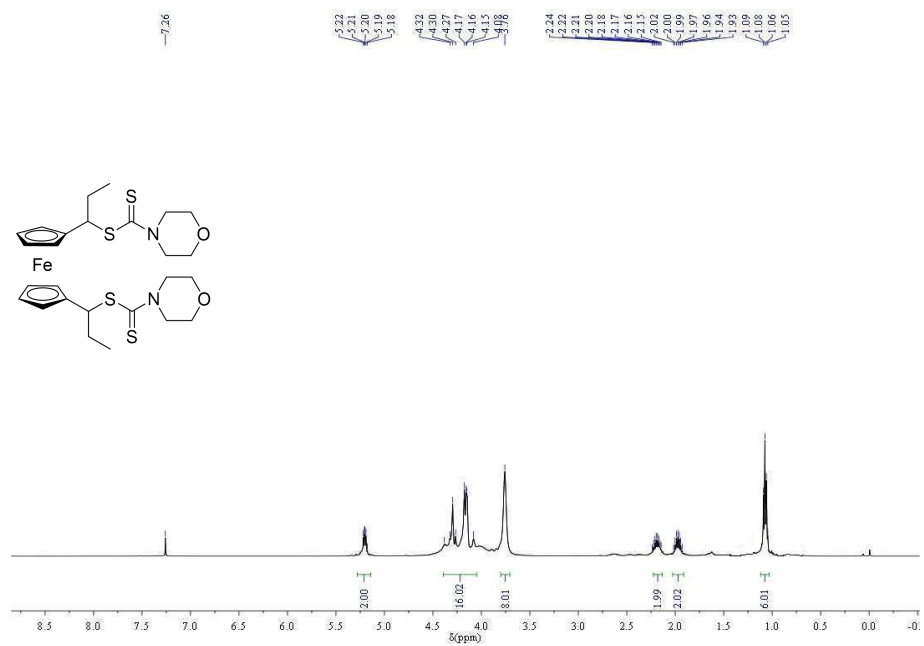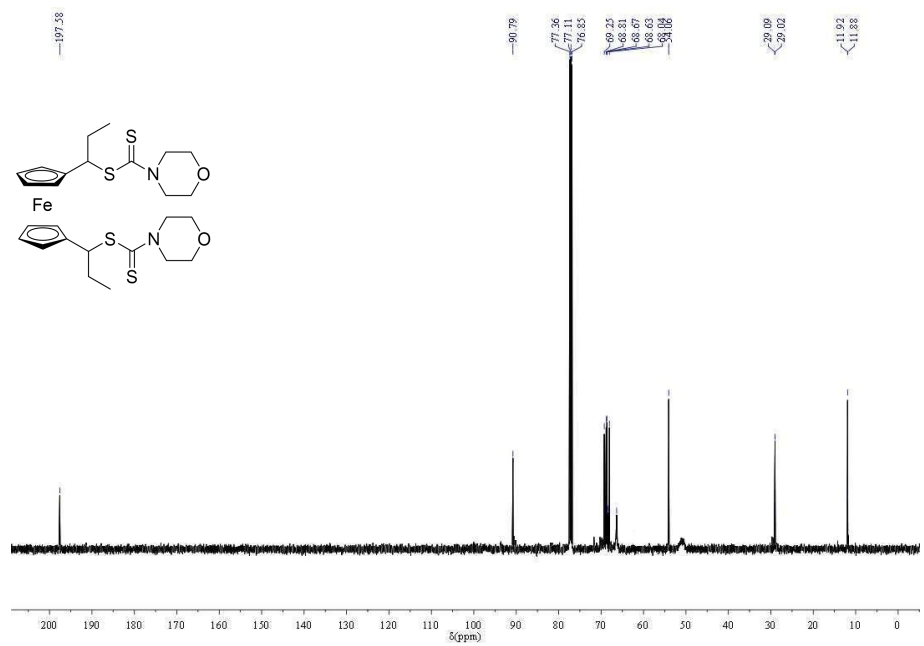

<sup>1</sup>H NMR spectra and <sup>13</sup>C NMR spectra for **5b**.

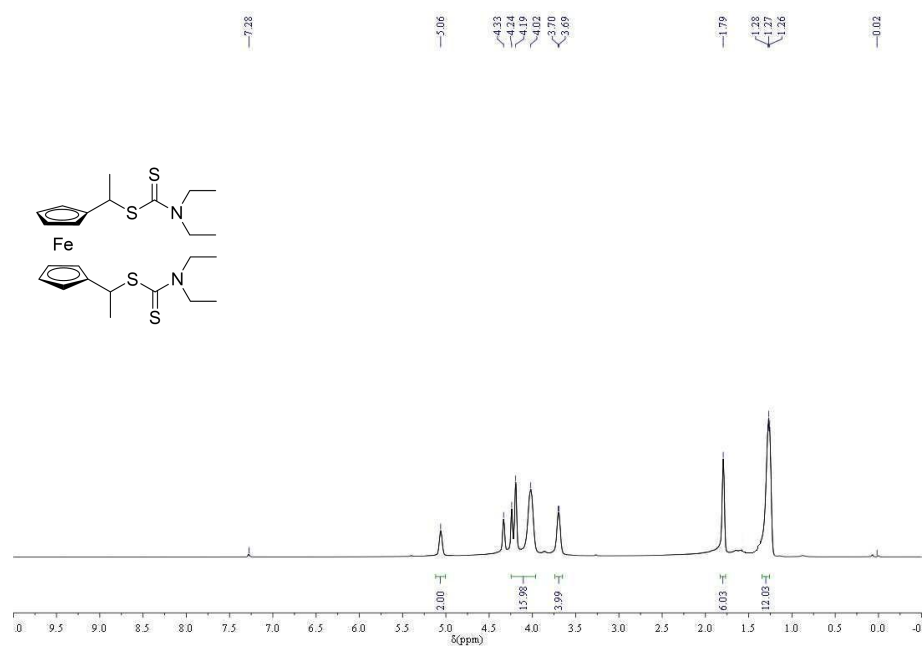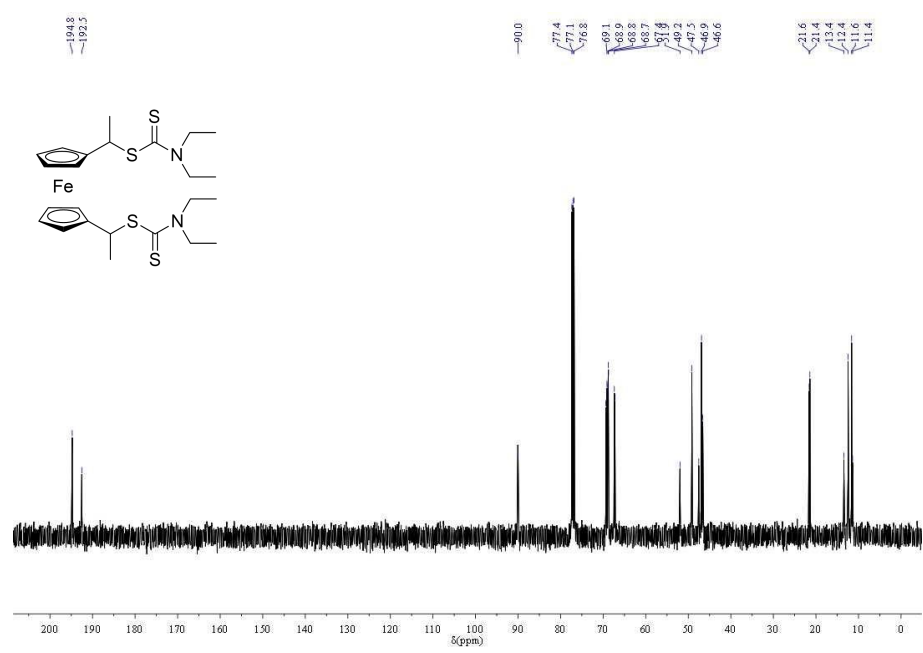

<sup>1</sup>H NMR spectra and <sup>13</sup>C NMR spectra for **5c**.

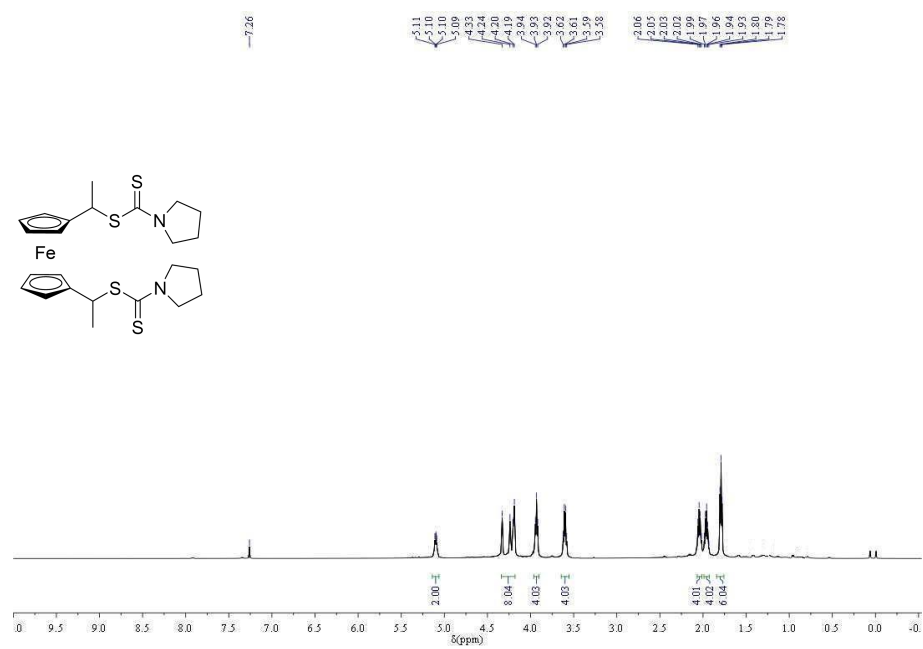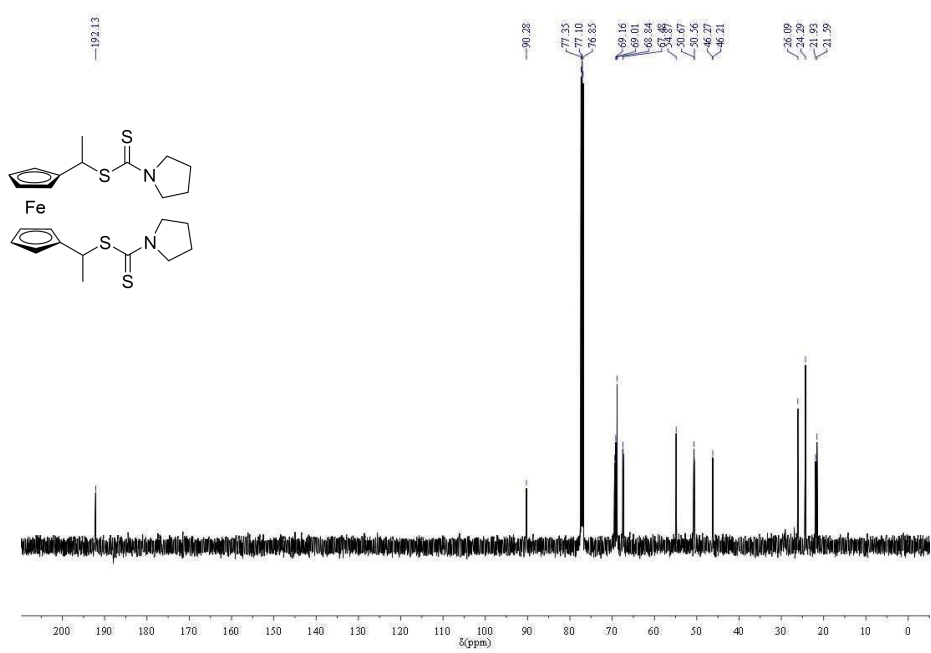

<sup>1</sup>H NMR spectra and <sup>13</sup>C NMR spectra for **5d**.

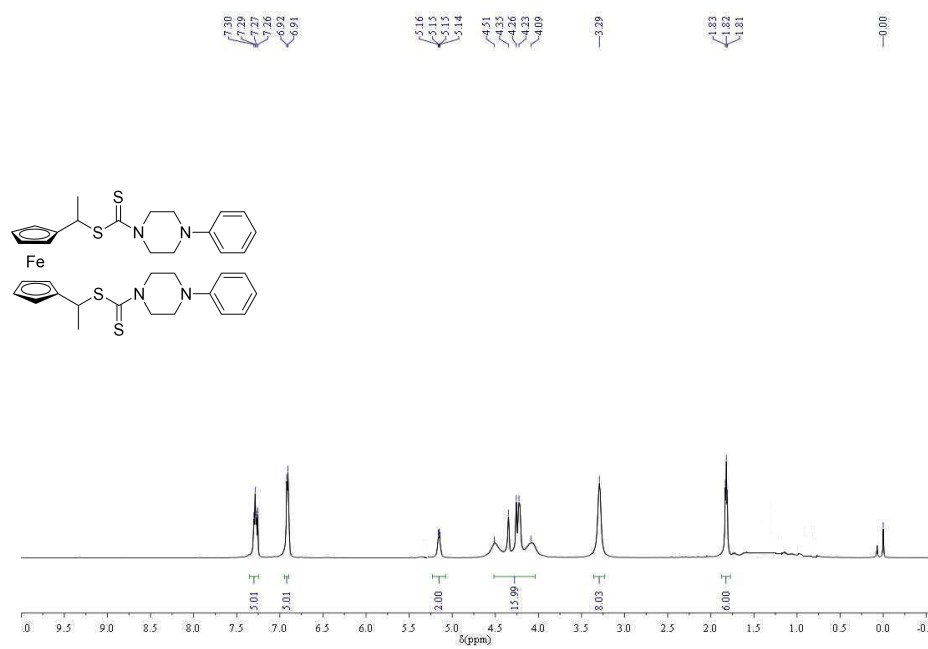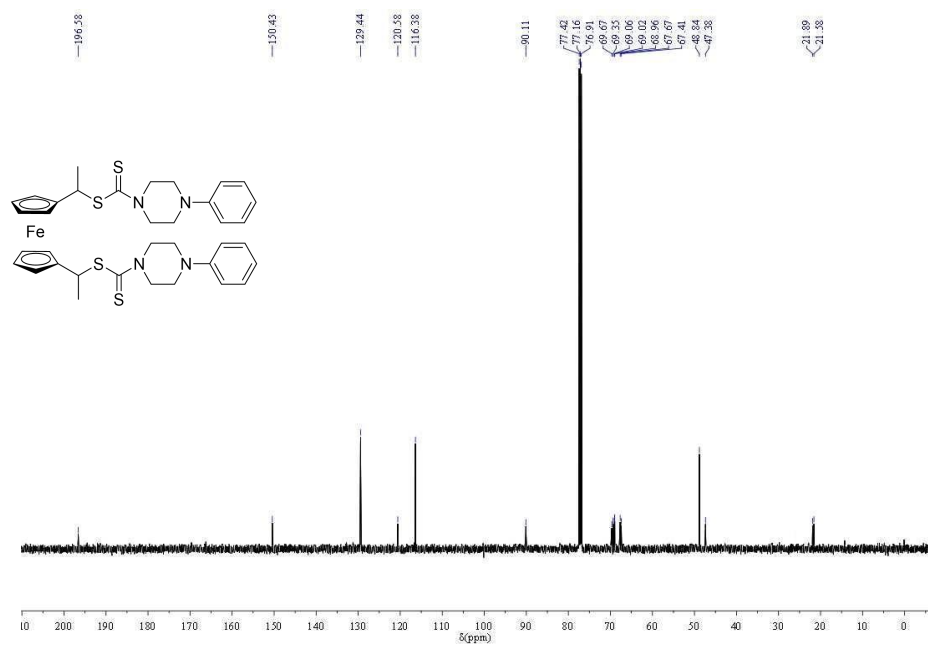

$^1\text{H}$  NMR spectra and  $^{13}\text{C}$  NMR spectra for **5e**.



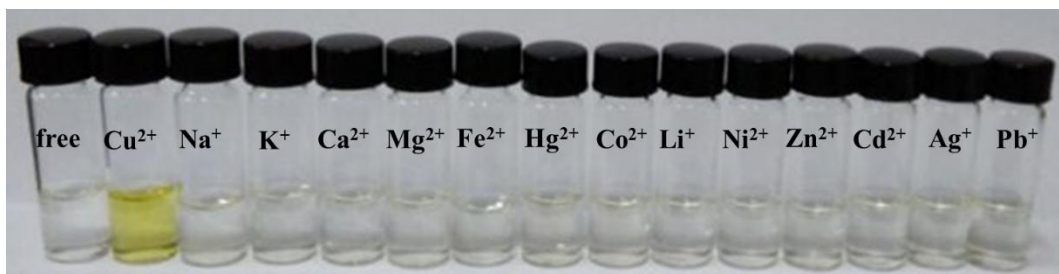

**Figure S1.** Visual color changes of probe **3e** upon addition of various metal ions (5 equiv) in CH<sub>3</sub>CN/H<sub>2</sub>O (7:3, v/v, 10 μM).

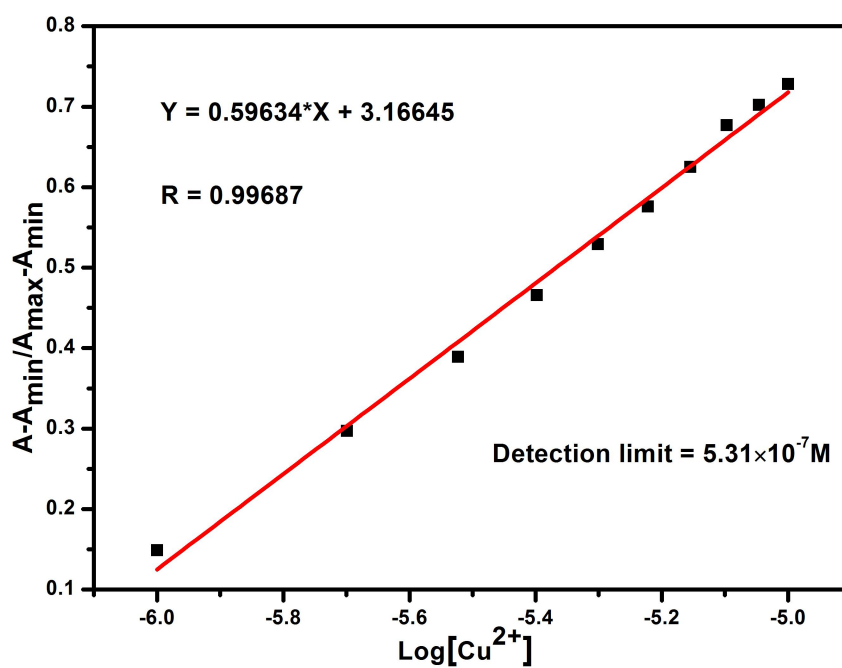

**Figure S2.** Benesi - Hildebrand plot obtained from the UV- vis absorption (absorption calculated from 423 nm) **3e**-Cu<sup>2+</sup>.

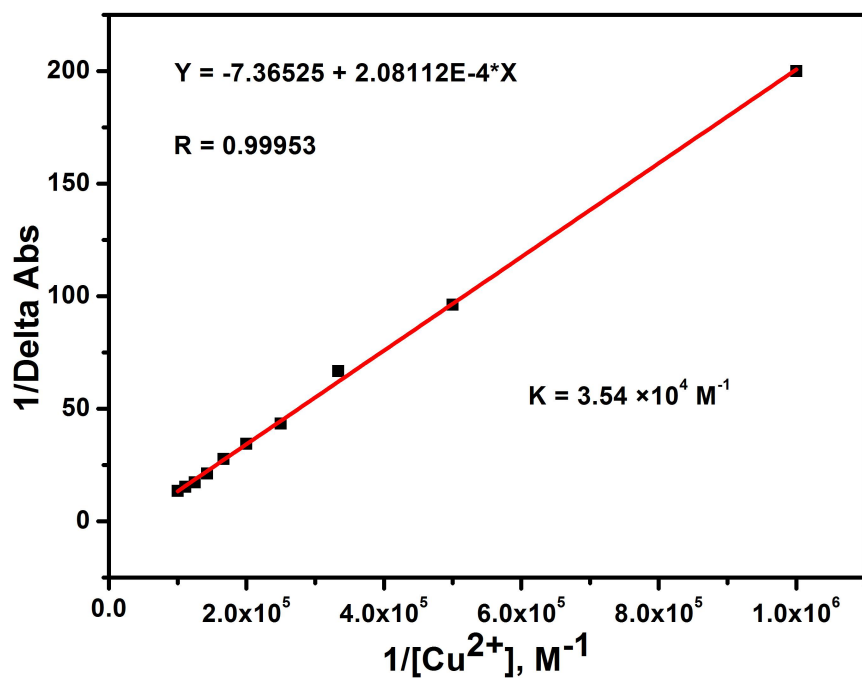

**Figure S3.** Benesi - Hildebrand plot obtained from the UV- vis absorption (absorption calculated from 423 nm)  $3\text{e-Cu}^{2+}$ .

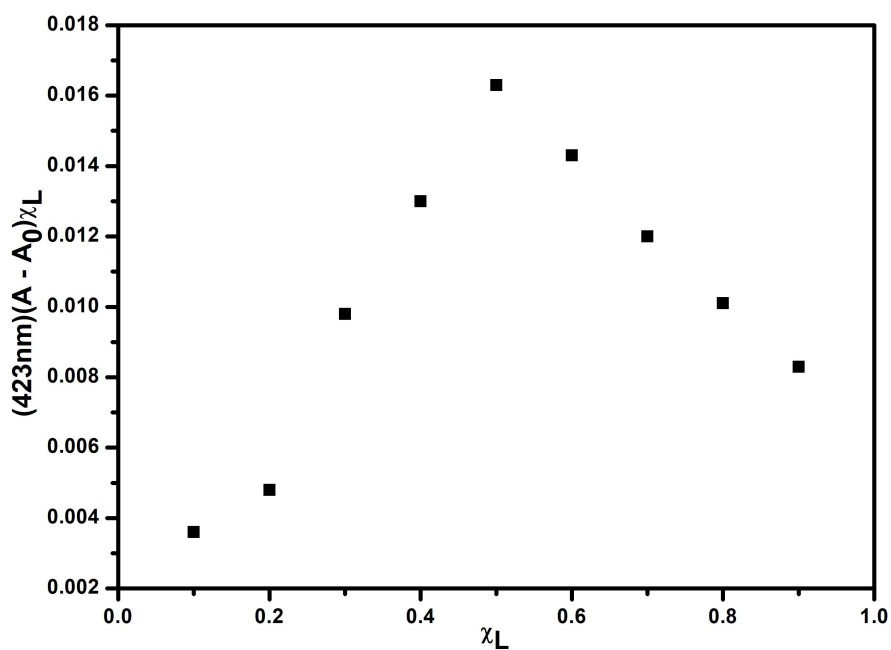

**Figure S4.** The Job's plot of receptor  $3\text{e-Cu}^{2+}$ .
